# Supplementary material
Source: PubMed Central journal article supplement (PMC2732811)
Supplement: 0901710106_ST4_PDF.pdf [file 0901710106_ST4_PDF.pdf]

Table S4. Recombination events mediated by short direct repeats in the *Arabidopsis* plastid genome

| Event          | Related <sup>1</sup><br>Events | Reaction                                    | Plant<br>lines   | DR positions                  | Short direct repeat sequences and junction                                                                                  | DR length and<br>(mismatches) |
|----------------|--------------------------------|---------------------------------------------|------------------|-------------------------------|-----------------------------------------------------------------------------------------------------------------------------|-------------------------------|
| 1              |                                | 5291REV<br>DUP/CIR <sup>2</sup><br>20481FOR | KO1/3            | 5204<br>recombinant<br>21835  | aaaagtttgaTTAGTTATGGGatcataaaaa<br>agtaggttttTTAGTTATGGGatcataaaaa<br>agtaggttttTTAGTTATGGGcctagcaaaa                       | (0)<br>11 bp<br>(0)           |
| 2              |                                | 19181FOR<br>DEL <sup>3</sup><br>31138REV    | KO1/3            | 19766<br>recombinant<br>30894 | ccatatctcaATAGATTGgcgtaat<br>ccatatctcaATAGATTGcctcatctca<br>actttccttgATAGATTGcctcatctca                                   | (0)<br>8 bp<br>(0)            |
| 3              |                                | 20481REV<br>DUP/CIR<br>30511FOR             | KO1,KO3<br>KO1/3 | 20366<br>recombinant<br>31005 | aatatatataCAAAAATTTTCTTTTTTtacacttctta<br>gttaagttatCAAAAATTTGCTTTTTTtacacttctta<br>gttaagttatCAAAAATTTGCTTTTTTTTTtttttagaa | (1)<br>18 bp<br>(0)           |
| 4 <sup>4</sup> |                                | 20481REV<br>DUP/CIR<br>30511FOR             | KO1/3            | 30300<br>recombinant<br>30827 | gtcatttatgCAAAAAAAAAAAtggttatgta<br>attggtctaaCATAAAAAAAAAAAtggttatgta<br>attggtctaaCATAAAAAAAAAAagaaaaaag                  | (1)<br>14 bp<br>(0)           |
| 5              |                                | 30511REV<br>DUP/CIR<br>40130FOR             | KO1/3            | 29711<br>recombinant<br>40160 | gaccctttctTTTGCTTTATgaaaaaagaa<br>aaaaccaagaTTTGCTTTATgaaaaaagaa<br>aaaaccaagaTTTGCTTTATctggatttaa                          | (0)<br>10 bp<br>(0)           |
| 6              | 23                             | 40130REV<br>DUP/CIR<br>50251FOR             | KO1/3            | 38989<br>recombinant<br>50299 | cccctggatgCAGGAATAGCgacatggact<br>aatgccaaaaCAGGAATAGCgacatggact<br>aatgccaaaaCAGGAATAGCacttgatatt                          | (0)<br>10 bp<br>(0)           |
| 7              |                                | 40130REV<br>DUP/CIR<br>50251FOR             | KO1/3            | 39109<br>recombinant<br>50758 | cttggttccATTTTGGTTGtaggtgtaac<br>gatagattgaATTTTGGTTGtaggtgtaac<br>gatagattgaATTTTGGTTGaatttaatta                           | (0)<br>10 bp<br>(0)           |

|    |                |                                 |                           |                               |                                                                                                                                             |                     |
|----|----------------|---------------------------------|---------------------------|-------------------------------|---------------------------------------------------------------------------------------------------------------------------------------------|---------------------|
| 8  |                | 40130REV<br>DUP/CIR<br>50251FOR | KO1/3                     | 39266<br>recombinant<br>51611 | cacctcctcgAGT <u>A</u> aacgcttcca<br>cattctacctAGCAaacgcttcca<br>cattctacctAGCAttgagtagac                                                   | (1)<br>4 bp<br>(0)  |
| 9  |                | 40130REV<br>DUP/CIR<br>50251FOR | KO1                       | 39411<br>recombinant<br>50322 | gtccacagaaAAAttattgctaa<br>tgatattagtAAAttattgctaa<br>tgatattagtAAAatgccaga                                                                 | (0)<br>3bp<br>(0)   |
| 10 |                | 40130REV<br>DUP/CIR<br>50251FOR | KO3                       | 39586<br>recombinant<br>50325 | ttaatgccataAATGCCtttcaaatcc<br>tattagtaaaAATGCCtttcaaatcc<br>tattagtaaaAATGCCcagaaaatat                                                     | (0)<br>6 bp<br>(0)  |
| 11 | 25,35          | 50251FOR<br>DEL<br>60182REV     | KO1/3                     | 50780<br>recombinant<br>59406 | tttaattagaTTTCTTTTTTTTATTTTTAAAcaggccgtg<br>tttaattagaTTTCTTTTTTTTATTTTTAAAaacttcgatt<br>tcatatcaccTTTTTTTTTTTTATTTTAAAAaacttcgatt          | (0)<br>20 bp<br>(2) |
| 12 |                | 50251FOR<br>DEL<br>60182REV     | KO1/3                     | 50847<br>recombinant<br>59726 | gggatacaaaaAAAAAAAAAGAAAGTattatgaact<br>gggatacaaaaAAAAAAAAAGAAAGTcatattttct<br>ctttgaaaacAAAAAAAAAGAAAGTcatattttct                         | (1)<br>15 bp<br>(0) |
| 13 | 14,18,21,22,24 | 50251FOR<br>DEL<br>60182REV     | KO1/3                     | 50474<br>recombinant<br>59953 | aggttaatcgAATCATTTTTTTTTCgtttggttg<br>aggttaatcgAATCATTTTTTTTTCcacaagggat<br>cgtcccagcaAATCATTTTTTTTTCcacaagggat                            | (0)<br>14 bp<br>(0) |
| 14 | 13,18,21,22,24 | 50513REV<br>DUP/CIR<br>68821FOR | KO1/3                     | 50488<br>recombinant<br>70515 | aaattcagggtTAATCGAATCATTTTTTTTTCgtttggttg<br>tttcaatataTAATCGAATCATTTTTTTTTCgtttggttg<br>tttcaatataTAATCGAA---TTTTTTTTtaatctaaaa            | (0)<br>19 bp<br>(3) |
| 15 |                | 50513REV<br>DUP/CIR<br>68821FOR | Col-0<br>KO1,KO3<br>KO1/3 | 50427<br>recombinant<br>69424 | aattccaatcGGAGTGGATTGGgcaaggata<br>tctaaaaaatGGAGTTGATTGGgcaaggata<br>tctaaaaaatGGAGTTGATTGGatttgcacca                                      | (1)<br>12 bp<br>(0) |
| 16 | 17             | 50513REV<br>DUP/CIR<br>68821FOR | KO1/3                     | 48553<br>recombinant<br>68998 | tagaattgtaTCCCCCCTTCATTTATTGCTttccgatctt<br>actctaacctTCCCCCCTTCATTTATTGCTttccgatctt<br>actctaacctTCCCC <u>ACCACT</u> ATTTTTTGGCTaggtattttc | (0)<br>21 bp<br>(5) |

|    |                |                                 |                           |                               |                                                                                                                                 |                     |
|----|----------------|---------------------------------|---------------------------|-------------------------------|---------------------------------------------------------------------------------------------------------------------------------|---------------------|
| 17 | 16             | 50513REV<br>DUP/CIR<br>68821FOR | KO1<br>KO1/3              | 49181<br>recombinant<br>68999 | tttttatttcCCCCACACCTTTTTTatataaaatt<br>ctctaacccttCCCCACACCTTTTTTatataaaatt<br>ctctaacccttCCCCAC <u>CACTAT</u> TTTTtgctaggta    | (0)<br>15 bp<br>(3) |
| 18 | 13,14,21,22    | 50513REV<br>DUP/CIR<br>68821FOR | KO1                       | 50482<br>recombinant<br>70117 | caaaaattcaGGTTAAT <u>CGAAT</u> CATTtttttttcggt<br>cgaactagcggGTTGAT-GGATCATTtttttttcggt<br>cgaactagcggGTTGAT-GGATCATTaccctgatga | (3)<br>15 bp<br>(0) |
| 19 |                | 50513REV<br>DUP/CIR<br>68821FOR | KO1/3                     | 50243<br>recombinant<br>70143 | tacctgattcATAAC <u>TAGAAA</u> gtttctccgg<br>ccctgatgatATAA-TAGAAAagtttctccg<br>ccctgatgatATAA-TAGAAAaggtttttct                  | (1)<br>10 bp<br>(0) |
| 20 |                | 50513REV<br>DUP/CIR<br>68821FOR | KO3                       | 49972<br>recombinant<br>70402 | gttttttttaCTTTTTTTTTTTTTAttattgtatc<br>cccaaagtgtCTTTTTTTTTTTTTAttattgtatc<br>cccaaagtgtCTTTTTTTTTTTTTTAcggtgtgaaa              | (0)<br>15 bp<br>(0) |
| 21 | 13,14,18,22,24 | 50513REV<br>DUP/CIR<br>59291REV | Col-0<br>KO1,KO3<br>KO1/3 | 50489<br>recombinant<br>59938 | aggttaatcgAATCATTTTTTTTTCgtttggtgt<br>cgtcccagcaAATCATTTTTTTTTCgtttggtgt<br>cgtcccagcaAATCATTTTTTTTTCcacaagggat                 | (0)<br>14 bp<br>(0) |
| 22 | 13,14,18,21,24 | 50513REV<br>DUP/CIR<br>59291REV | KO1/3                     | 50489<br>recombinant<br>59936 | tcaggttaatCGAATCATTTTTTTTTCgtttggttg<br>tccgtcccagCGAATCATTTTTTTTTCgtttggttg<br>tccgtcccagCAATCATTTTTTTTTCcacaagggat            | (0)<br>16 bp<br>(1) |
| 23 | 6              | 50513REV<br>DUP/CIR<br>59291REV | KO1/3                     | 50309<br>recombinant<br>60067 | atgccaaaacAGGAATAGcacttgat<br>accgaaaagaAAGAATAGcacttgat<br>accgaaaagaAGGAATAGtgcgtat                                           | (0)<br>8 bp<br>(0)  |
| 24 | 13,14,21,22    | 50513REV<br>DUP/CIR<br>59291REV | KO1/3                     | 50495<br>recombinant<br>60081 | gaatcattttTTTTCGTTGGTtggtgtggt<br>tagtgcgatTTTTCGTTGGGttggtgtggt<br>tagtgcgatTTTTCGTTGGGgatttctcgg                              | (1)<br>11 bp<br>(0) |
| 25 | 11,32,35       | 54551REV<br>DUP/CIR<br>58730FOR | KO1/3                     | 54523<br>recombinant<br>59387 | ctcattagccTTTTTTTTTCGTATTTTcatttagca<br>catatcacctTTTTTTTTTCGTATTTTcatttagca<br>catatcacctTTTTTTTTT-TTATTTTaaaaactcgg           | (0)<br>16 bp<br>(2) |

|    |          |                                 |              |                               |                                                                                                                                             |                     |
|----|----------|---------------------------------|--------------|-------------------------------|---------------------------------------------------------------------------------------------------------------------------------------------|---------------------|
| 26 |          | 59291REV<br>DUP/CIR<br>69633FOR | KO1/3        | 58721<br>recombinant<br>70186 | attagactagACAAACAAAAAAAAgttcattttc<br>agacgggataACAAACAAAAAAAAgttcattttc<br>agacgggataACAA <u>AAAA</u> AAAAAAAAatagataaat                   | (0)<br>14 bp<br>(1) |
| 27 | 28       | 59291REV<br>DUP/CIR<br>69633FOR | KO1/3        | 59287<br>recombinant<br>70228 | acttaccctcTATTTTTGTGCCTTtagtaggcct<br>ccgtacaggcTTTTTTGTGCCTTtagtaggcct<br>ccgtacaggcTTTTTTGTGCATTgcatacggct                                | (1)<br>14 bp<br>(1) |
| 28 | 27       | 59291REV<br>DUP/CIR<br>69633FOR | KO1/3        | 59028<br>recombinant<br>70225 | tatttagtttGGCTTTTTTTGTacctatTTTT<br>taaccgtacaGGCTTTTTTTGTacctatTTTT<br>taaccgtacaGGCTTTTTTTGTgcattgcata                                    | (0)<br>12 bp<br>(0) |
| 29 | 30, 36   | 59291REV<br>DUP/CIR<br>69633FOR | KO1/3        | 59039<br>recombinant<br>69901 | ttttttgtaCCTATTTTTTtattctattt<br>tgaaatcgctCCTATTTTTTtattctattt<br>tgaaatcgctCCTATTTTTTattgaaccgc                                           | (0)<br>10 bp<br>(0) |
| 30 | 29,35,36 | 59291REV<br>DUP/CIR<br>69633FOR | KO3<br>KO1/3 | 59043<br>recombinant<br>69807 | ttttgtaccTATTTTTTATTctatttctat<br>ttctcttcaaTATTTTTTATTctatttctat<br>ttctcttcaaTATTTTTTATTtttatattga                                        | (0)<br>12 bp<br>(0) |
| 31 |          | 59311FOR<br>DEL<br>69633REV     | KO1/3        | 59307<br>recombinant<br>68984 | tctttccggcAATTGCAATGGCTTctttatttct<br>tctttccggcAATTGCAATGGCTTtgctactct<br>gtataaaaaAATT <u>CA</u> ATGGCTTtgctactct                         | (0)<br>14 bp<br>(1) |
| 32 | 25,36    | 59311FOR<br>DEL<br>69633REV     | KO1/3        | 59380<br>recombinant<br>68522 | accgaatcatATC <u>AC</u> CTTTTTTTTTtattttaaaa<br>accgaatcatATCCCCTTATTTTTTTatgtcattcg<br>atttcttccaATCCCCTTATTTTTTTatgtcattcg                | (2)<br>16 bp<br>(0) |
| 33 |          | 58730FOR<br>DEL<br>69941REV     | KO1/3        | 58973<br>recombinant<br>69303 | acatctagttGTAGTTGATTTGAAAGATGAataagtccat<br>acatctagttGTAGTTGATTTGAAAGATGAattaggtcatt<br>tacagtaacgGTATTT <u>CA</u> TTTTGAAAATTGattaggtcatt | (0)<br>21 bp<br>(4) |
| 34 |          | 58730FOR<br>DEL<br>69941REV     | KO1/3        | 59590<br>recombinant<br>69740 | gtatataactATAGGGGATCATATAAAggaaggagat<br>gtatataactATAGGGGATCATATAAAtaatgggctg<br>aatggttggcATAC <u>CGA</u> ATCATATAAAtaatgggctg            | (0)<br>17 bp<br>(2) |

|    |             |                                   |       |                                 |                                                                                                                                  |                     |
|----|-------------|-----------------------------------|-------|---------------------------------|----------------------------------------------------------------------------------------------------------------------------------|---------------------|
| 35 | 11,25,30,32 | 58730FOR<br>DEL<br>69941REV       | KO1/3 | 59390<br>recombinant<br>69822   | atcaccttttTTTTTTATTTTaaaaacttcg<br>atcaccttttTTTTTTATTTTtatattgaag<br>ctcttcaataTTTTTTATTTTtatattgaag                            | (0)<br>12 bp<br>(0) |
| 36 | 30,32       | 58730FOR<br>DEL<br>69941REV       | KO1/3 | 59030<br>recombinant<br>68524   | ttttgtaccTATTTTTTATtctatttcta<br>ttttgtaccTATTTTTTATgtcattcgaa<br>ccaatcccctTATTTTTTATgtcattcgaa                                 | (0)<br>11 bp<br>(0) |
| 37 |             | 58730FOR<br>DEL<br>69941REV       | KO1/3 | 59074<br>recombinant<br>69714   | ctattctataTATTTCTATTAGGTTGTATattaatattag<br>ctattctataTATTTCTATTAGGTTGTTTAatggttggca<br>tggctgtctgTATTTCTAATAAGTTGTTTAatggttggca | (1)<br>20 bp<br>(2) |
| 38 |             | 69633REV<br>DUP/CIR<br>79920FOR   | KO1/3 | 69468<br>recombinant<br>80032   | atgtaaaccaTAAGTTTCAGAcacaatagag<br>tcacaaattgTAAGTTACAGAcacaatagag<br>tcacaaattgTAAGTTACAGAtatctaattt                            | (1)<br>11 bp<br>(0) |
| 39 |             | 79920REV<br>DUP/CIR<br>111330FOR  | KO1/3 | 78747<br>recombinant<br>111896  | aagctcttcgCATcgcaatgcct<br>ggtaaccataCATcgcaatgcct<br>ggtaaccataCATgaagaggaaa                                                    | (0)<br>3 bp<br>(0)  |
| 40 |             | 79920REV<br>DUP/CIR<br>111330FOR  | KO1/3 | 76183<br>recombinant<br>111428  | tgggcagcaaAGGGTGTTCCTCTTcttgtacccc<br>ccacaaagagAGAGTGTTCCTCTTcttgtacccc<br>ccacaaagagAGAGTGTTCCTATTaaaaaggccg                   | (1)<br>14 bp<br>(1) |
| 41 |             | 79920REV<br>DUP/CIR<br>111330FOR  | KO1/3 | 78830<br>recombinant<br>111688  | ataataaagaCGCTTACTGTCTCTTTttgattcaac<br>ggctaaaccCGCTTACTGTCTCTTTttgattcaac<br>ggctaaaccCGCTTAATGTCTTTTgagcaagagc                | (0)<br>16 bp<br>(2) |
| 42 |             | 84761REV<br>DUP/CIR<br>95260FOR   | KO1/3 | 84370<br>recombinant<br>95699   | acggcgacgaAGAATCAAAGTctcactatatt<br>ctggagtgggAGAATCAAAGTctcactatatt<br>ctggagtgggAGAGTCAGAGTCgaaaagagga                         | (0)<br>13 bp<br>(2) |
| 43 |             | 105983REV<br>DUP/CIR<br>116007FOR | KO1/3 | 104982<br>recombinant<br>116127 | gtgggagagcAAAAAAGcgtcgtgctg<br>tcctgccaagAAAAAAGcgtcgtgctc<br>tcctgccaagAAAAAAGtgcagcgcca                                        | (0)<br>8 bp<br>(0)  |

|    |  |                                   |              |                                 |                                                                                                                              |                                    |
|----|--|-----------------------------------|--------------|---------------------------------|------------------------------------------------------------------------------------------------------------------------------|------------------------------------|
| 44 |  | 105983REV<br>DUP/CIR<br>116007FOR | KO1<br>KO1/3 | 105322<br>recombinant<br>116009 | <p>tggttggttAAGGGAACCCACCGgagccgtagc</p> <p>ccggcaatgcAAGGGAACCCACCGgagccgtagc</p> <p>ccggcaatgcAAGGGAAGCCATCGataaaatagt</p> | <p>(0)</p> <p>14 bp</p> <p>(2)</p> |
|----|--|-----------------------------------|--------------|---------------------------------|------------------------------------------------------------------------------------------------------------------------------|------------------------------------|

<sup>1</sup> Related events implicate at least part of a direct repeat that is found independently in another recombination event.

<sup>2</sup> DUP/CIR = Illegitimate recombination event yielding a duplicated/circularized product and detected using outward-facing PCR.

<sup>3</sup> DEL = Illegitimate recombination event yielding a deletion-containing product and detected using inward-facing PCR.

<sup>4</sup> Non-specific annealing of primer 20481REV at positions 30367-30346 yielded this product.
