# Supplementary material
Source: PubMed Central journal article supplement (PMC2732811)
Supplement: 0901710106_ST5_PDF.pdf [file 0901710106_ST5_PDF.pdf]

Table S5. Recombination events mediated by short direct repeats in the maize plastid genome

| Events | Related Events | Reaction                                     | Plant lines | DR positions <sup>2</sup>     | Short direct repeat sequences and junctions                                                             | DR length and (mismatches) |
|--------|----------------|----------------------------------------------|-------------|-------------------------------|---------------------------------------------------------------------------------------------------------|----------------------------|
| 1      |                | 15001REV<br>DUP/CIR <sup>1</sup><br>50141FOR | Why1-1      | 14923<br>recombinant<br>50999 | aattcgactcCCAACCCtTTTTTTtaga<br>aattagataaCCAACCCtTTTTTTtaga<br>aattagataaCCAACCCtGctgcattgt            | (0)<br>8 bp<br>(0)         |
| 2      |                | 15001REV<br>DUP/CIR<br>50141FOR              | Why1-1      | 14492<br>recombinant<br>50341 | aggagtgagaTGACTTTCCAAAatTTTTcata<br>aacaatatgTGATTTTCCAAAatTTTTcata<br>aacaatatgTGATTTTCCAAAattggaaaata | (1)<br>12 bp<br>(0)        |
| 3      |                | 25060REV<br>DUP/CIR<br>35230FOR              | Why1-2/-1   | 24850<br>recombinant<br>36373 | tggcgaagtcACAAGGccctccactt<br>aacaagctgtACAAGGccctccactt<br>aacaagctgtACAAGGagctctagga                  | (0)<br>6 bp<br>(0)         |
| 4      |                | 25060REV<br>DUP/CIR<br>35230FOR              | Why1-2      | 25015<br>recombinant<br>35708 | ggggtagaatTTgttgattctc<br>ataaaaggaaTTgttgattctc<br>ataaaaggaaTTctatcaattt                              | (0)<br>2 bp<br>(0)         |
| 5      |                | 25060REV<br>DUP/CIR<br>35230FOR              | Why1-1      | 24796<br>recombinant<br>35785 | tttcccctcaACAAATAAAGgcttgggcta<br>cagagcaaacACAAATAAAGgcttgggcta<br>cagagcaaacACAAATAAAGaaacaacttt      | (0)<br>10 bp<br>(0)        |
| 6      |                | 25060REV<br>DUP/CIR<br>35230FOR              | Why1-1      | 24258<br>recombinant<br>35542 | cccgagtaccCGGGAAAAGCagaatatttg<br>atgctttaaaCGGGAAATAGCagaatatttg<br>atgctttaaaCGGGAAATAGCtagttagaa     | (1)<br>11 bp<br>(0)        |
| 7      |                | 29971REV<br>DUP/CIR<br>54971FOR              | Why1-1      | 29627<br>recombinant<br>55252 | tttctgaagAGGCGGATAagatattagg<br>ctgcctaataAGGCGGATAagatattagg<br>ctgcctaataAGGCGGATActtccgatcc          | (0)<br>9 bp<br>(0)         |

|    |    |                                 |                  |                               |                                                                                                                                                                     |                     |
|----|----|---------------------------------|------------------|-------------------------------|---------------------------------------------------------------------------------------------------------------------------------------------------------------------|---------------------|
| 8  |    | 29971REV<br>DUP/CIR<br>54971FOR | Why1-1           | 29507<br>recombinant<br>55692 | attattggagTCGATAcacaactcac<br>gtatctaacTCGATAcacaactcac<br>gtatctaacTCGATAaaggcaggcg                                                                                | (0)<br>6 bp<br>(0)  |
| 9  |    | 29971REV<br>DUP/CIR<br>54971FOR | Why1-1           | 29434<br>recombinant<br>55437 | gtagatcgggTTTTTTTCATTcctcaagaac<br>ttcctcaataTTTTTTTCATTcctcaagaac<br>ttcctcaataTTTTTTTCATTaattactccg                                                               | (0)<br>11 bp<br>(0) |
| 10 | 11 | 29971REV<br>DUP/CIR<br>54971FOR | Why1-1<br>Why1-2 | 26297<br>recombinant<br>56132 | ctaaggaatcAAAAAAAAAGGAAAaattggggtt<br>ataat <del>ttt</del> caAAAAAAAAAGGAAAaattggggtt<br>ataat <del>ttt</del> caAAAAAAAAAGGAAtttgtcgaaa                             | (0)<br>12 bp<br>(0) |
| 11 | 10 | 29971REV<br>DUP/CIR<br>54971FOR | WT               | 26691<br>recombinant<br>56131 | tctaaggaatCAAAAAAaggaaaaattg<br>acataat <del>ttt</del> CAAAAAAaggaaaaattg<br>acataat <del>ttt</del> CAAAAAAaggaatttgt                                               | (0)<br>9 bp<br>(0)  |
| 12 |    | 40020REV<br>DUP/CIR<br>45152FOR | Why1-2/-1        | 39662<br>recombinant<br>45567 | ggccgctcgcaAGGAAAAC <del>T</del> ATAcccgaaatcc<br>ttaatgctagAGGAAAAC <del>T</del> ATAcccgaaatcc<br>ttaatgctagAGGAAAAC <del>G</del> ATAgctccaagaa                    | (0)<br>12 bp<br>(1) |
| 13 |    | 45152REV<br>DUP/CIR<br>59880FOR | Why1-2           | 44350<br>recombinant<br>60179 | tccgcaatttCCGAATCGCCCTgtagaatggc<br>caaaaagctgCCGAATCGCCCTgtagaatggc<br>caaaaagctgCCGAATTGGCCTat <del>tt</del> ccttgcg                                              | (0)<br>12 bp<br>(2) |
| 14 |    | 45152REV<br>DUP/CIR<br>59880FOR | Why1-1           | 45065<br>recombinant<br>60562 | agtattcactAGAAA--ATTTCCTCCTTTCTTttttttcttc<br>atgaaaaaaaaAGAAAGCATTGCCTCCTTTCTTttttttcttc<br>atgaaaaaaaaAGAAAGCATTGCCTTCTTTCTTat <del>at</del> cctt <del>g</del> ta | (3)<br>22 bp<br>(1) |
| 15 |    | 45152REV<br>DUP/CIR<br>59880FOR | Why1-1           | 44815<br>recombinant<br>60324 | gattcctaaaTTTGTCCcatatcgtgg<br>ttcgaatttgTTTTGTCCcatatcgtgg<br>ttcgaatttgTTTTGTCCaagt <del>g</del> agata                                                            | (0)<br>8 bp<br>(0)  |
| 16 |    | 45152REV<br>DUP/CIR<br>59880FOR | Why1-1           | 45075<br>recombinant<br>61177 | ttcctccttTCTTTTTTTtcttctttct<br>aaat <del>ttt</del> gggTCTTTTTTTtcttctttct<br>aaat <del>ttt</del> gggTCTTTTTTTgtt <del>ta</del> aaccg                               | (0)<br>9 bp<br>(0)  |

|    |  |                                 |           |                               |                                                                                                                                                    |                     |
|----|--|---------------------------------|-----------|-------------------------------|----------------------------------------------------------------------------------------------------------------------------------------------------|---------------------|
| 17 |  | 45152REV<br>DUP/CIR<br>59880FOR | Why1-2/-1 | 44253<br>recombinant<br>60796 | cgtaatctttAAC <u>C</u> AGTTctgtgcttcaa<br>acacatgtacAAACAGTTctgtgcttcaa<br>acacatgtacAAAA <u>A</u> CTTCctataggaat                                  | (1)<br>9 bp<br>(2)  |
| 18 |  | 54971REV<br>DUP/CIR<br>64883FOR | Why1-1    | 54631<br>recombinant<br>65071 | ataaagatthAATTCATTTCTTCAATttgctctcct<br>ccgaaaatccAATTCATTTCTTCAATttgctctcct<br>ccgaaaatccAATTCATTT-TTCAATggggtagat                                | (0)<br>17 bp<br>(1) |
| 19 |  | 59880REV<br>DUP/CIR<br>74851FOR | Why1-1    | 58828<br>recombinant<br>74980 | caactgggtaTTCTATTCCACTTCTACTTTTTAAattaaaggg<br>ccaattcaatTTTTATTCCACTTCTACTTTTTAAattaaaggg<br>ccaattcaatTTTTATT <u>A</u> CACTT--ACTTTTTAttatagtatg | (1)<br>22 bp<br>(3) |
| 20 |  | 59880REV<br>DUP/CIR<br>74851FOR | Why1-1    | 59266<br>recombinant<br>76157 | tatttccggcAATTGCAATGACTTccttatttct<br>aagaggaaaaAATTGCAATGACTTccttatttct<br>aagaggaaaaAATTGCAATGATTTaaagcgagaa                                     | (0)<br>14 bp<br>(1) |

<sup>1</sup>DUP/CIR = Illegitimate recombination event yielding a duplicated/circularized product and detected using outward-facing PCR.

<sup>2</sup> The positions of the direct repeats refer to the numbers of the nucleotides in the published Maize Chloroplast Genome Sequence (10)
