# Supplementary material
Source: PubMed Central journal article supplement (PMC2732811)
Supplement: 0901710106_ST6_PDF.pdf [file 0901710106_ST6_PDF.pdf]

**Table S6. Short direct repeat-mediated recombination frequency in maize**

| <b>Plant line</b> | <b>PCR reactions</b> | <b>Recombination events</b> |
|-------------------|----------------------|-----------------------------|
| WT                | 19                   | 1                           |
| Why1-2            | 19                   | 3                           |
| Why1-2/-1         | 19                   | 3                           |
| Why1-1            | 19                   | 14                          |
